# Supplementary material
Source: ML conference proceedings conference paper supplement (https://openreview.net/forum?id=UvMSKonce8)
Supplement: supplementary_material [file attachment]

## Correct Answer

| Test Sample                                                                         | Will the AI Predict Correctly? (Yes/No) | Test Sample                                                                          | Will the AI Predict Correctly? (Yes/No) |
|-------------------------------------------------------------------------------------|-----------------------------------------|--------------------------------------------------------------------------------------|-----------------------------------------|
|    | Yes                                     |    | Yes                                     |
|    | Yes                                     |    | No                                      |
|   | Yes                                     |   | No                                      |
|  | Yes                                     |  | Yes                                     |
|  | No                                      |  | Yes                                     |

| Test Sample                                                                         | Will the AI Predict Correctly? (Yes/No) | Test Sample                                                                          | Will the AI Predict Correctly? (Yes/No) |
|-------------------------------------------------------------------------------------|-----------------------------------------|--------------------------------------------------------------------------------------|-----------------------------------------|
|    | Yes                                     |    | Yes                                     |
|    | Yes                                     |    | No                                      |
|   | Yes                                     |   | No                                      |
|  | No                                      |  | Yes                                     |
|  | No                                      |  | Yes                                     |

| Test Sample                                                                         | Will the AI Predict Correctly? (Yes/No) | Test Sample                                                                          | Will the AI Predict Correctly? (Yes/No) |
|-------------------------------------------------------------------------------------|-----------------------------------------|--------------------------------------------------------------------------------------|-----------------------------------------|
| 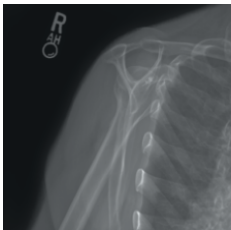   | Yes                                     |    | No                                      |
|    | No                                      |    | Yes                                     |
|   | No                                      |   | Yes                                     |
|  | Yes                                     |  | Yes                                     |
|  | Yes                                     |  | Yes                                     |
